# Supplementary material for: Higher Levels of Serum Uric Acid Have a Significant Association with Lower Incidence of Lower Urinary Tract Symptoms in Healthy Korean Men
Source: MDPI journal article supplement (doi:10.3390/metabo12070649), 2022-07-14
Supplement: s1 [file s1]

**Supplementary Table S1.** Hazard ratios<sup>1</sup> (95% CI) of LUTS (> 8) by uric acid level after further excluding subjects with diabetes and metabolic syndrome.

| Uric Acid Level<br>(mg/dL) | Multivariate-Adjusted HR <sup>1</sup> (95% CI)                             |                                                                                       |
|----------------------------|----------------------------------------------------------------------------|---------------------------------------------------------------------------------------|
|                            | After further excluding 3637<br>participants with diabetes<br>(n = 97,454) | After further excluding 13148<br>participants with metabolic<br>syndrome (n = 87,943) |
| <5.5                       | 1.00 (reference)                                                           | 1.00 (reference)                                                                      |
| 5.5–6.4                    | 0.99 (0.95–1.03)                                                           | 0.99 (0.95–1.04)                                                                      |
| 6.5–7.4                    | 0.97 (0.92–1.02)                                                           | 0.97 (0.92–1.02)                                                                      |
| 7.5–8.4                    | 1.02 (0.94–1.07)                                                           | 1.03 (0.95–1.10)                                                                      |
| 8.5–9.4                    | 0.89 (0.78–1.01)                                                           | 0.88 (0.76–1.02)                                                                      |
| ≥9.5                       | 0.73 (0.58–0.93)                                                           | 0.75 (0.56–0.99)                                                                      |
| <b>p for trend</b>         | 0.051                                                                      | 0.174                                                                                 |

<sup>1</sup>Estimated from parametric proportional hazard model.

The multivariable model was adjusted for age, center, year of a screening exam, smoking status, alcohol intake, physical activity, educational level, total calorie intake, BMI, history of diabetes, history of hypertension, eGFR, total cholesterol, HOMA-IR, and hsCRP. Diabetes was defined as a fasting glucose concentration ≥ 126 mg/dL, glycated hemoglobin concentration ≥ 6.5%, or currently taking antidiabetic medications or insulin. Metabolic syndrome was determined by having three or more components among five components: triglyceride ≥ 150 mg/dL; high-density lipoprotein < 40 mg/dL; systolic blood pressure ≥ 130 mmHg and/or diastolic blood pressure ≥ 85 mmHg or use of antihypertensive medication; fasting glucose ≥ 100 mg/dL or use of anti-diabetic medication, and abdominal obesity. BMI, body mass index; eGFR, estimated glomerular filtration rate; HOMA-IR, homeostasis model assessment of insulin resistance; hsCRP, high-sensitivity C-reactive protein; LUTS, lower urinary tract symptoms.
